# Supplementary material for: Exposure to and Burden of Major Non-Communicable Disease Risk Factors in Brazil and its States, 1990-2019: The Global Burden of Disease Study
Source: PubMed Central journal article supplement (PMC9022946; doi:10.1590/0037-8682-0275-2021), 2022-01-28
Supplement: 1678-9849-rsbmt-55-e0275-2021-supp7.pdf [file 1678-9849-rsbmt-55-e0275-2021-supp7.pdf]

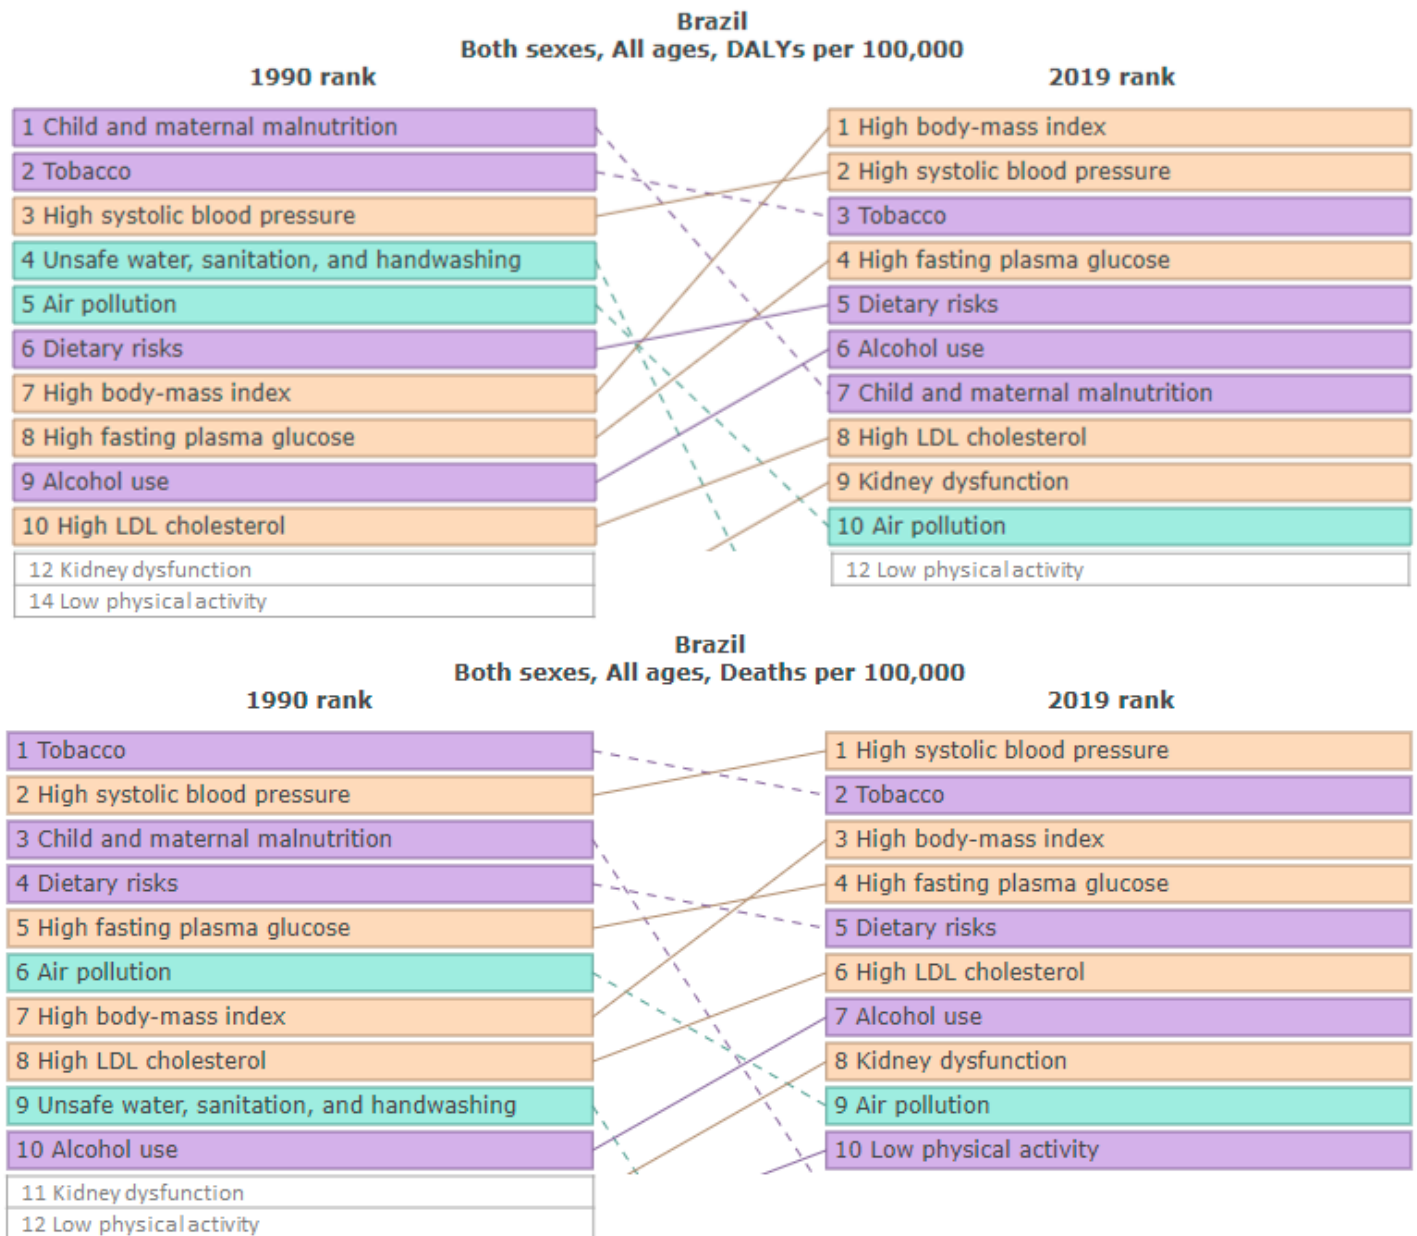

**Supplementary Figure 6.** Ranking of top 10 risk factors in terms of the crude, all-cause DALYs and deaths attributable to them, Brazil 1990-2019. Purple=behavioral, Orange=metabolic, Blue=environmental. See the specific values of percent change and rates at:

<http://ihmeuw.org/5ds3> (DALYs) and <http://ihmeuw.org/5fa8> (Deaths).
